# Supplementary material
Source: Springer Nature journal article supplement (https://www.springermedizin.de/resource/supplementary/12888_2013_1419_MOESM2_ESM.pdf/9480166)

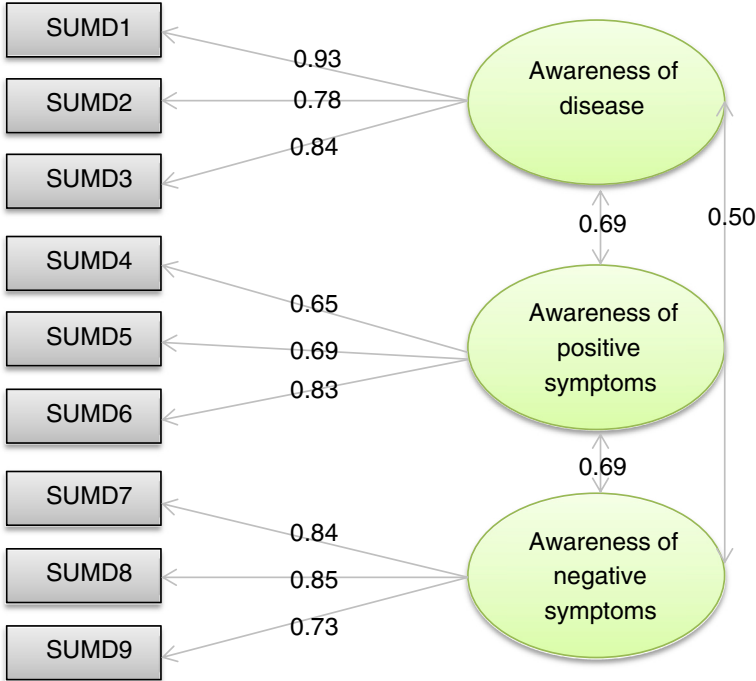

Supplement: MOESM2 [file 9480166]
